# Supplementary material for: Development of an online-coupled MARGA upgrade for the two-hourly quantification of low-molecular weight organic acids in the gas and particle-phase
Source: Copernicus journal article supplement (doi:10.5194/amt-2018-299), 2018-10-12
Supplement: Supplementary file 1 [file amt-2018-299-supplement.pdf]

1 Electronic Supplementary Material

2

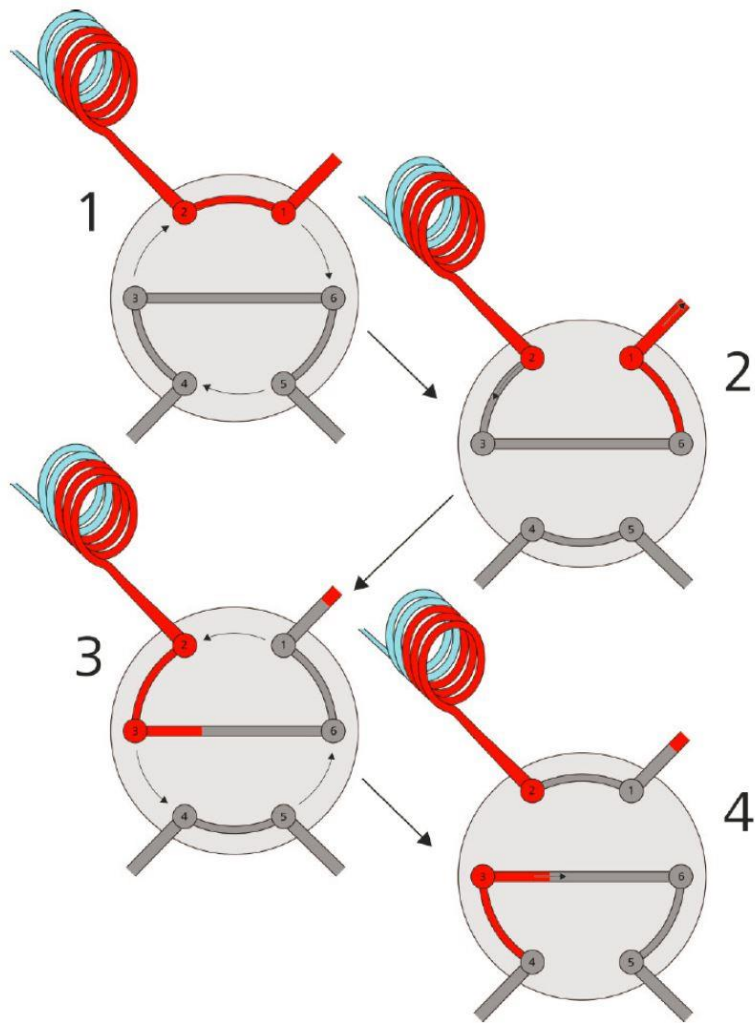

3

4 **Figure S1.** Switch modes of the external 6-way-valve. (1) Sample loop is filled with the sample  
5 solutions. In (2) and (3) valve is switched to “fill mode” to pre-concentrate the sample. During  
6 the “injection mode” in (4), the eluent dissolved the trapped ions and flows to the  
7 separation columns. ([https://www.metrohm.com/de-de/produkte/ionenchromatographie/ionen](https://www.metrohm.com/de-de/produkte/ionenchromatographie/ionenchromatographie-inline-probenvorbereitung/)  
8 [chromatographie-inline-probenvorbereitung/](https://www.metrohm.com/de-de/produkte/ionenchromatographie/ionenchromatographie-inline-probenvorbereitung/), 10<sup>th</sup> August 2018)

9

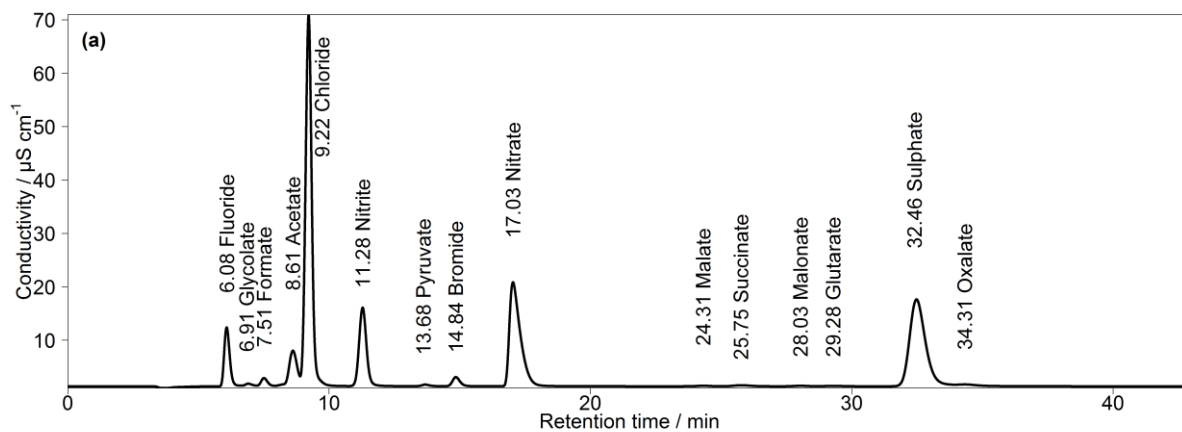

10

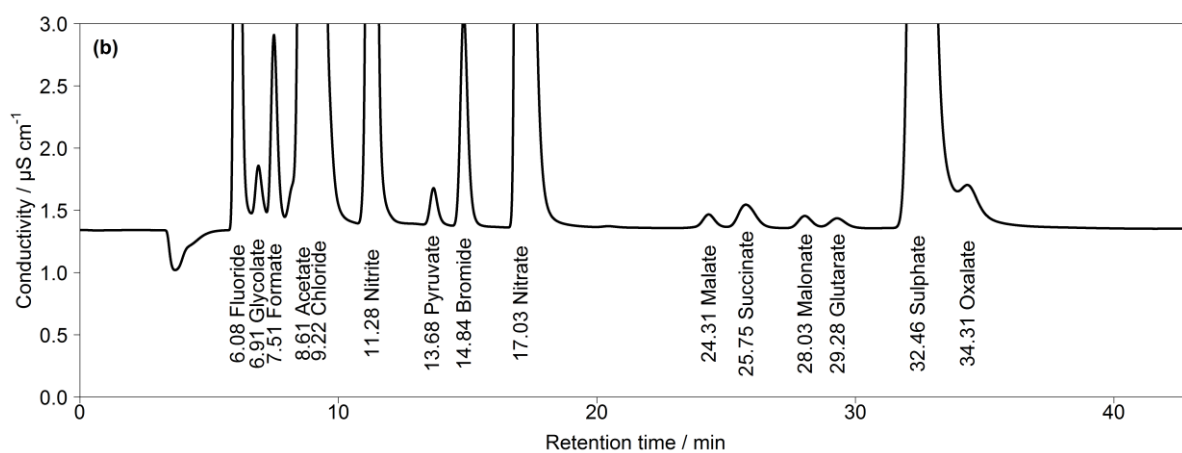

11

12 **Figure S2.** (a) Chromatogram of a standard solution with aqueous concentrations of  $150 \mu\text{g l}^{-1}$   
 13 for  $\text{Cl}^-$ ,  $\text{NO}_3^-$ ,  $\text{SO}_4^{2-}$ ,  $75 \mu\text{g l}^{-1}$  for  $\text{NO}_2^-$ ,  $15 \mu\text{g l}^{-1}$  for  $\text{F}^-$ ,  $\text{Br}^-$  and  $3 \mu\text{g l}^{-1}$  for all organic acids.  
 14 Numbers in front of the ion names are the retention times.  $T = 65^\circ\text{C}$  and eluent flow of  
 15  $0.8 \text{ ml min}^{-1}$ . (b) Zoom in of (a).

16

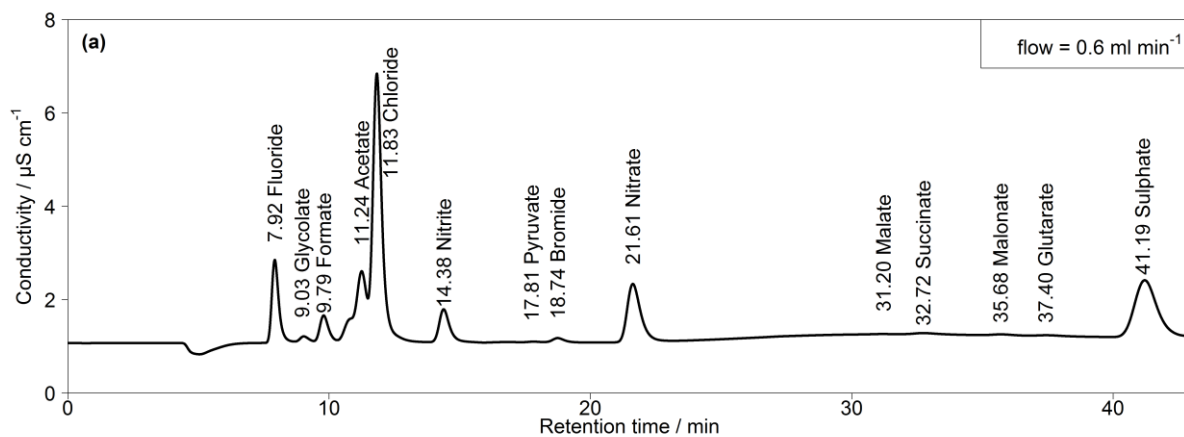

17

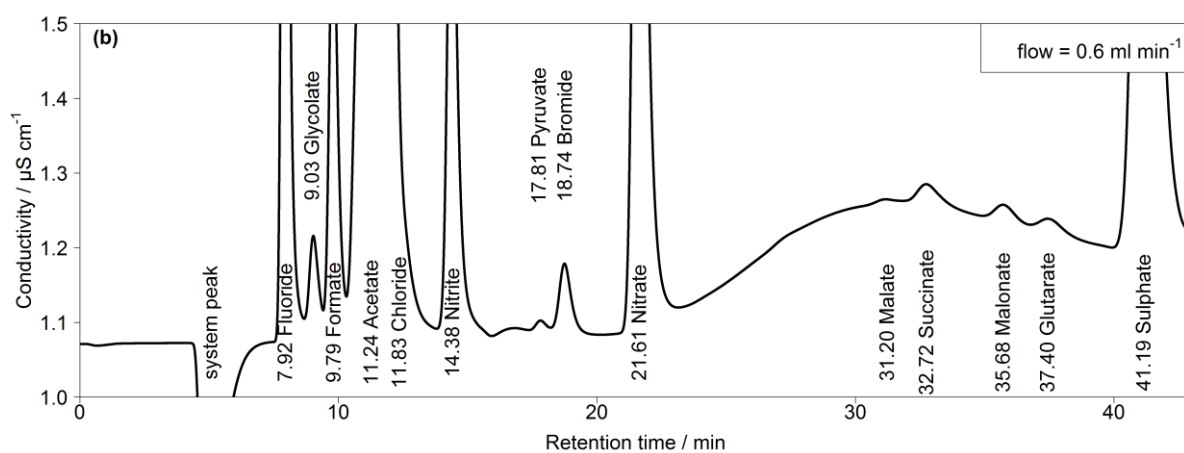

18

19 **Figure S3.** (a) Chromatogram of a standard solution with aqueous concentrations of  $10 \mu\text{g l}^{-1}$   
 20 for  $\text{Cl}^-$ ,  $\text{NO}_3^-$ ,  $\text{SO}_4^{2-}$ ,  $5 \mu\text{g l}^{-1}$  for  $\text{NO}_2^-$  and  $1 \mu\text{g l}^{-1}$  for  $\text{F}^-$ ,  $\text{Br}^-$  as well as all organic acids.  
 21 Numbers in front of the ion names are the retention times.  $T = 65^\circ\text{C}$  and eluent flow of  
 22  $0.6 \text{ ml min}^{-1}$ . (b) Zoom in of chromatogram in (a).

23

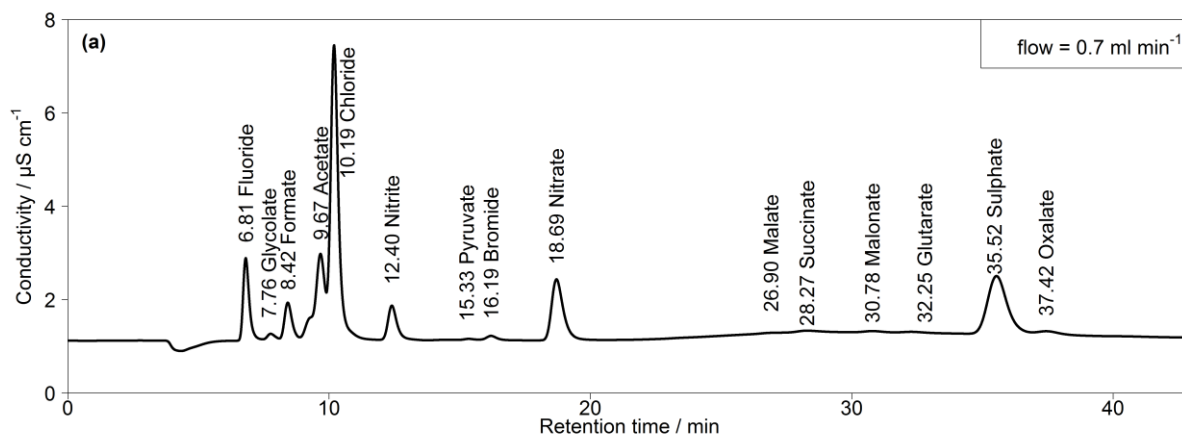

24

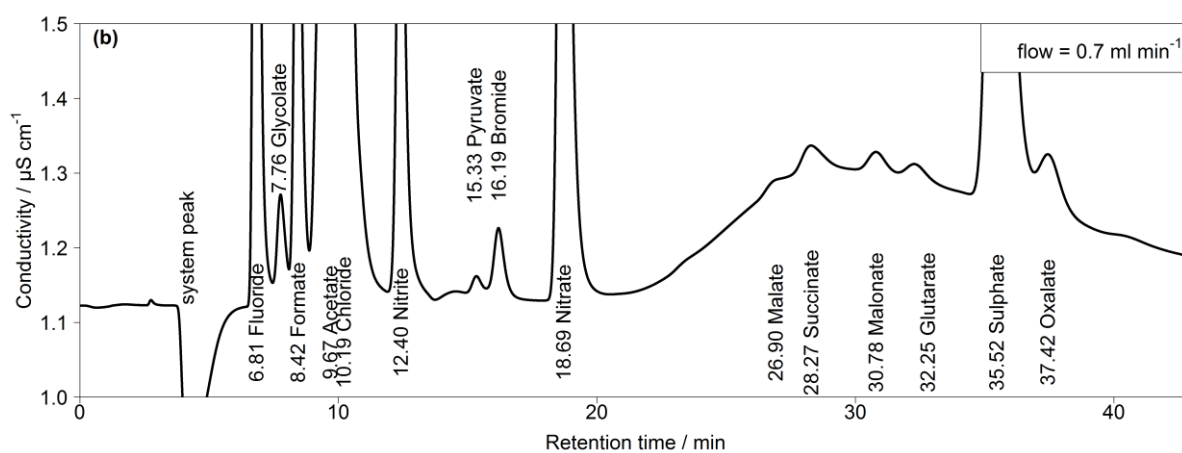

25

26 **Figure S4.** (a) Chromatogram of a standard solution with aqueous concentrations of  $10 \mu\text{g l}^{-1}$   
 27 for  $\text{Cl}^-$ ,  $\text{NO}_3^-$ ,  $\text{SO}_4^{2-}$ ,  $5 \mu\text{g l}^{-1}$  for  $\text{NO}_2^-$  and  $1 \mu\text{g l}^{-1}$  for  $\text{F}^-$ ,  $\text{Br}^-$  as well as all organic acids.  
 28 Numbers in front of the ion names are the retention times.  $T = 65 \text{ }^\circ\text{C}$  and eluent flow of  
 29  $0.7 \text{ ml min}^{-1}$ . (b) Zoom in of chromatogram in (a).

30

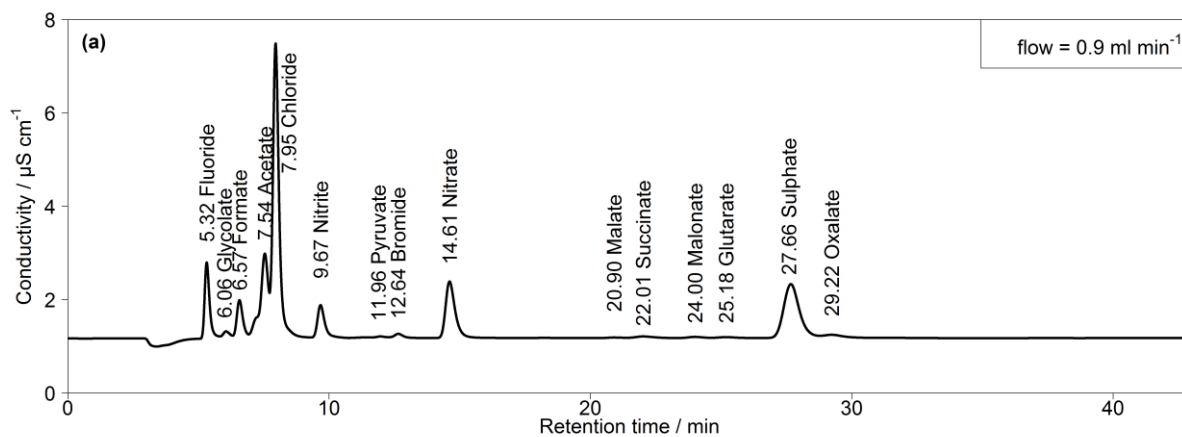

31

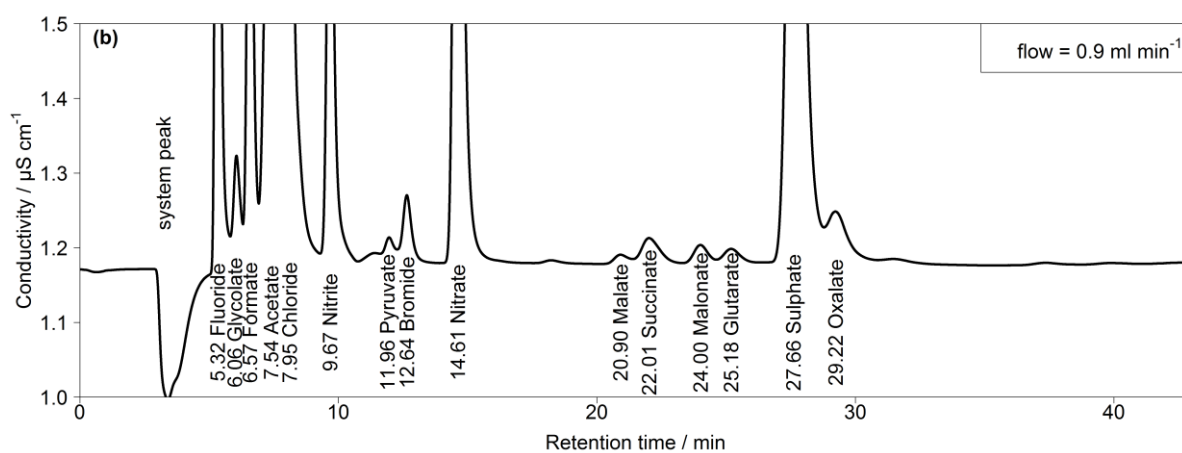

32

33 **Figure S5.** (a) Chromatogram of a standard solution with aqueous concentrations of  $10 \mu\text{g l}^{-1}$   
 34 for  $\text{Cl}^-$ ,  $\text{NO}_3^-$ ,  $\text{SO}_4^{2-}$ ,  $5 \mu\text{g l}^{-1}$  for  $\text{NO}_2^-$  and  $1 \mu\text{g l}^{-1}$  for  $\text{F}^-$ ,  $\text{Br}^-$  as well as all organic acids.  
 35 Numbers in front of the ion names are the retention times.  $T = 65^\circ\text{C}$  and eluent flow of  
 36  $0.9 \text{ ml min}^{-1}$ . (b) Zoom in of chromatogram in (a).

37

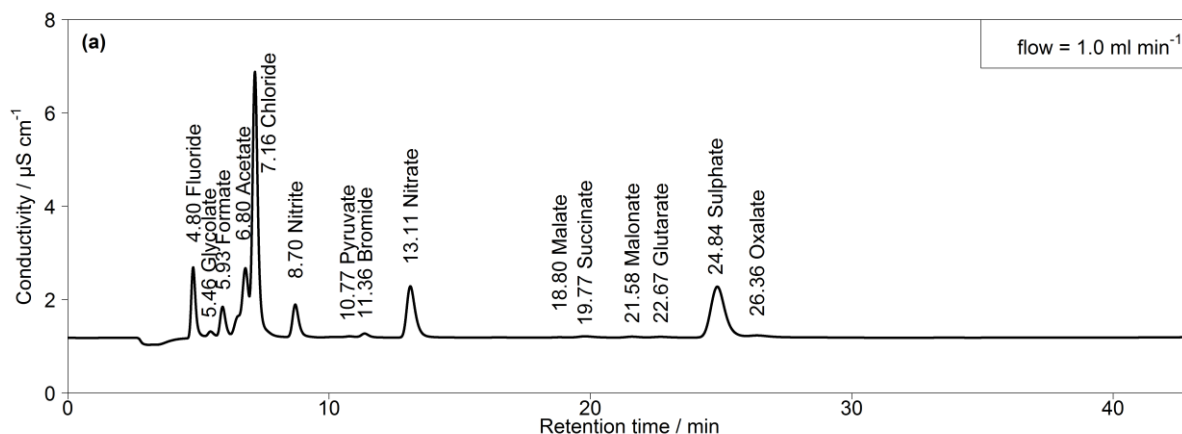

38

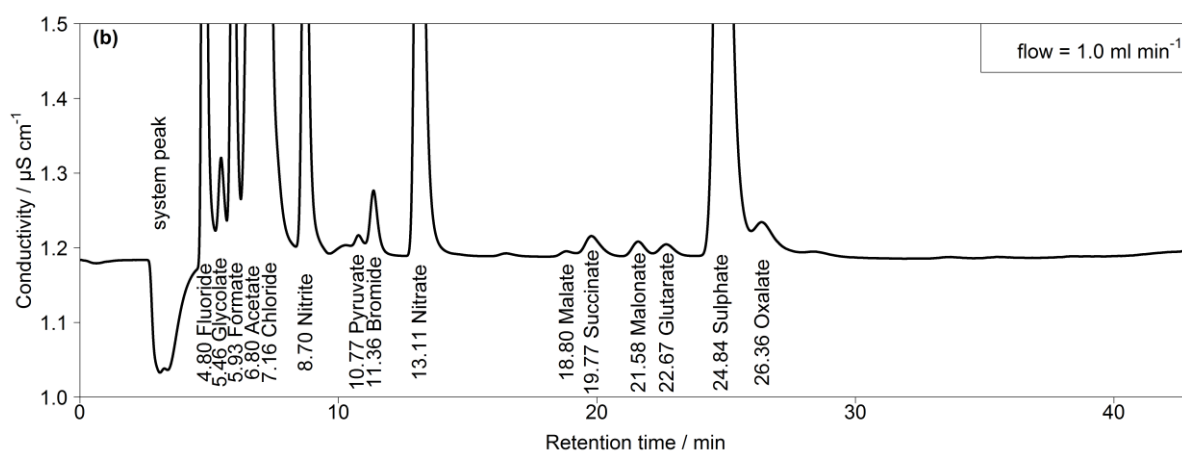

39

40 **Figure S6.** (a) Chromatogram of a standard solution with aqueous concentrations of  $10 \mu\text{g l}^{-1}$   
 41 for  $\text{Cl}^-$ ,  $\text{NO}_3^-$ ,  $\text{SO}_4^{2-}$ ,  $5 \mu\text{g l}^{-1}$  for  $\text{NO}_2^-$  and  $1 \mu\text{g l}^{-1}$  for  $\text{F}^-$ ,  $\text{Br}^-$  as well as all organic acids.  
 42 Numbers in front of the ion names are the retention times.  $T = 65^\circ\text{C}$  and eluent flow of  
 43  $1.0 \text{ ml min}^{-1}$ . (b) Zoom in of chromatogram in (a).

44

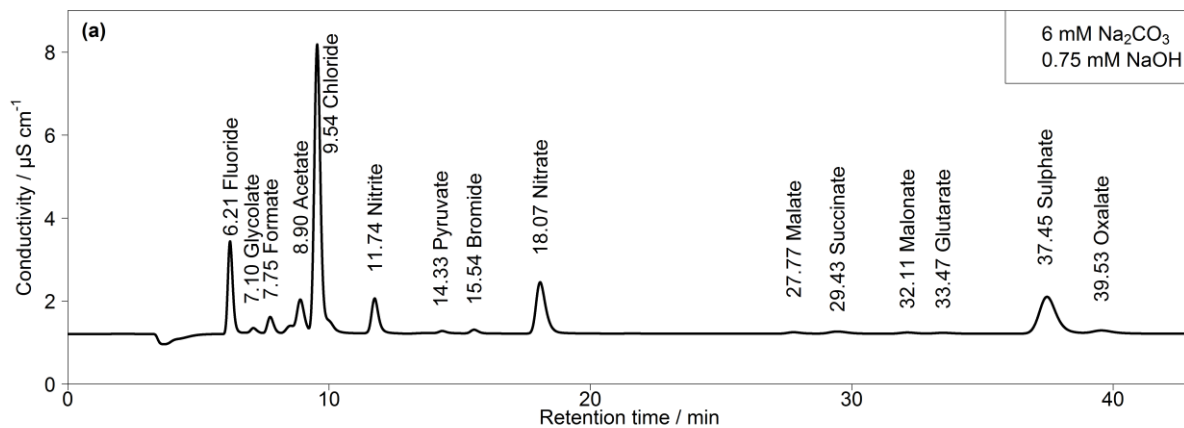

45

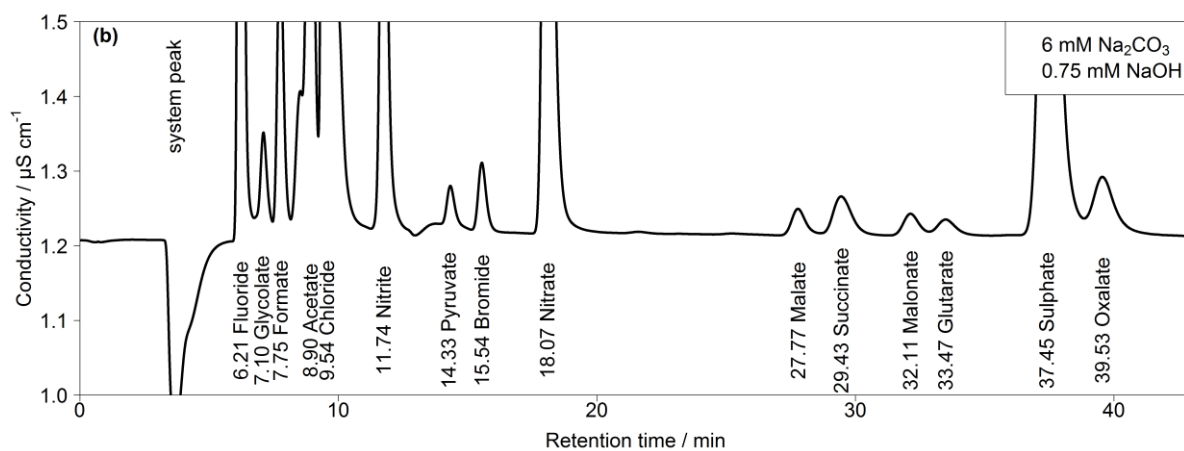

46

47 **Figure S7.** (a) Different eluent concentration of 6 mM  $\text{Na}_2\text{CO}_3$  and 0.75 mM NaOH.  
 48 Chromatogram of a standard solution with aqueous concentrations of  $10 \mu\text{g l}^{-1}$  for  $\text{Cl}^-$ ,  $\text{NO}_3^-$ ,  
 49  $\text{SO}_4^{2-}$ ,  $5 \mu\text{g l}^{-1}$  for  $\text{NO}_2^-$  and  $1 \mu\text{g l}^{-1}$  for  $\text{F}^-$ ,  $\text{Br}^-$  as well as all organic acids. Numbers in front of  
 50 the ion names are the retention times.  $T = 65 \text{ }^\circ\text{C}$  and eluent flow of  $0.8 \text{ ml min}^{-1}$ . (b) Zoom in  
 51 of chromatogram in (a).

52

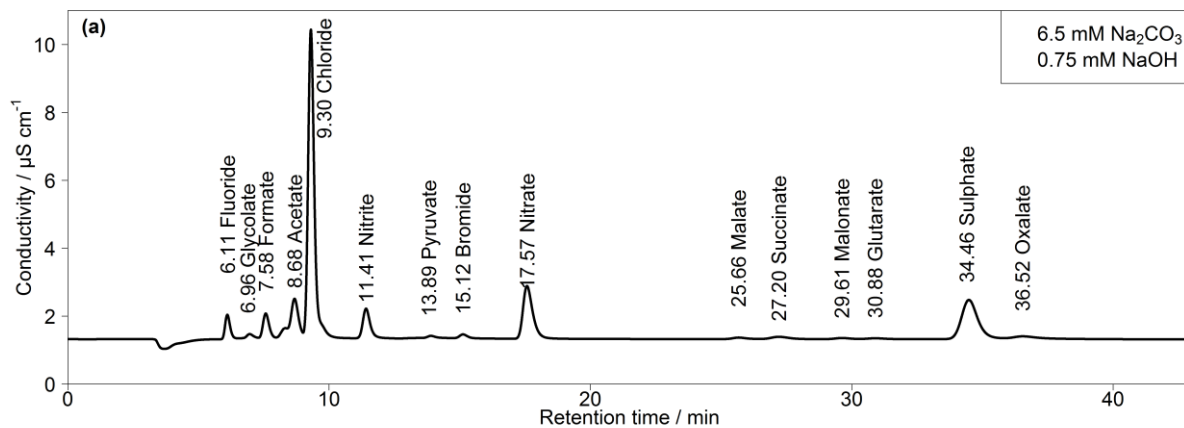

53

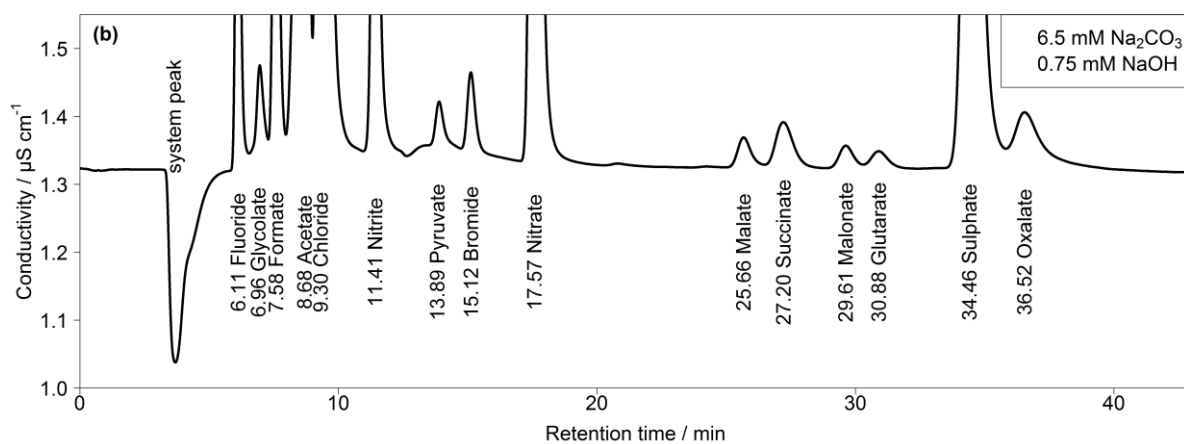

54

55 **Figure S8.** (a) Different eluent concentration of 6.5 mM  $\text{Na}_2\text{CO}_3$  and 0.75 mM NaOH.  
 56 Chromatogram of a standard solution with aqueous concentrations of  $10 \mu\text{g l}^{-1}$  for  $\text{Cl}^-$ ,  $\text{NO}_3^-$ ,  
 57  $\text{SO}_4^{2-}$ ,  $5 \mu\text{g l}^{-1}$  for  $\text{NO}_2^-$  and  $1 \mu\text{g l}^{-1}$  for  $\text{F}^-$ ,  $\text{Br}^-$  as well as all organic acids. Numbers in front of  
 58 the ion names are the retention times.  $T = 65 \text{ }^\circ\text{C}$  and eluent flow of  $0.8 \text{ ml min}^{-1}$ . (b) Zoom in  
 59 of chromatogram in (a).

60



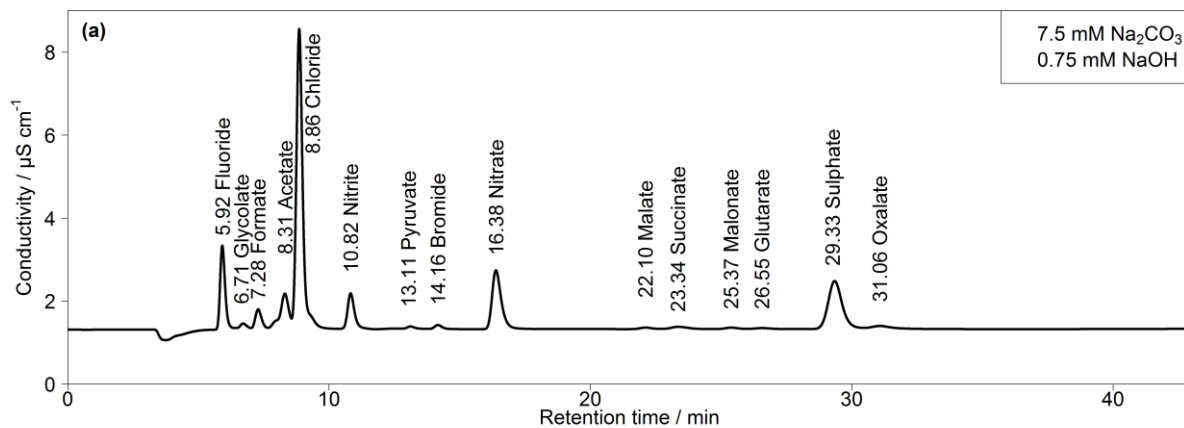

61

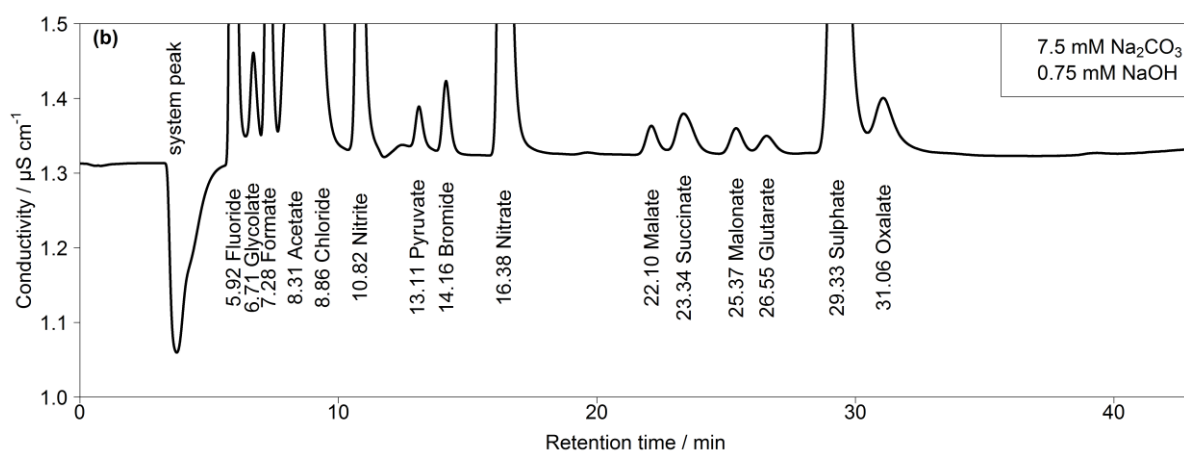

62

63 **Figure S9.** (a) Different eluent concentration of 7.5 mM Na<sub>2</sub>CO<sub>3</sub> and 0.75 mM NaOH.  
 64 Chromatogram of a standard solution with aqueous concentrations of 10 μg l<sup>-1</sup> for Cl<sup>-</sup>, NO<sub>3</sub><sup>-</sup>,  
 65 SO<sub>4</sub><sup>2-</sup>, 5 μg l<sup>-1</sup> for NO<sub>2</sub><sup>-</sup> and 1 μg l<sup>-1</sup> for F<sup>-</sup>, Br<sup>-</sup> as well as all organic acids. Numbers in front of  
 66 the ion names are the retention times. T = 65 °C and eluent flow of 0.8 ml min<sup>-1</sup>. (b) Zoom in  
 67 of chromatogram in (a).

68

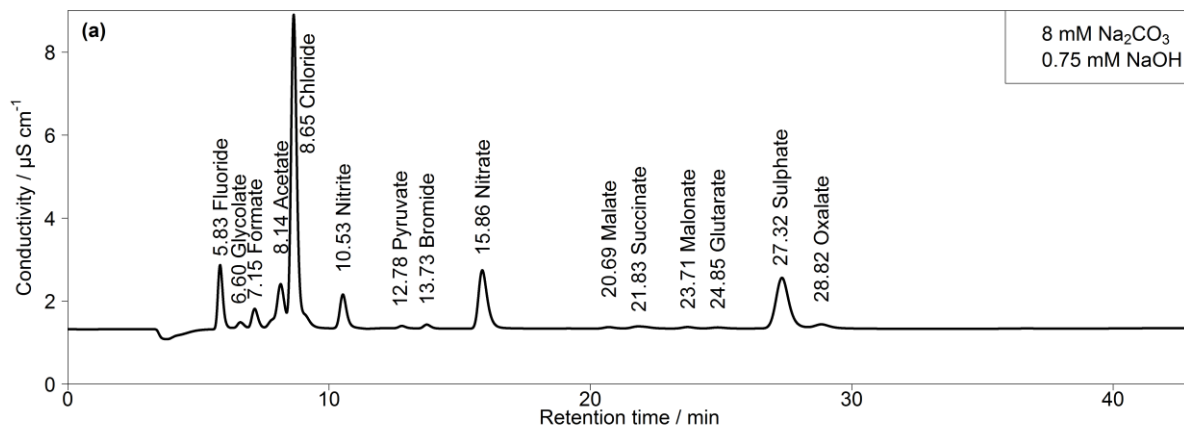

69

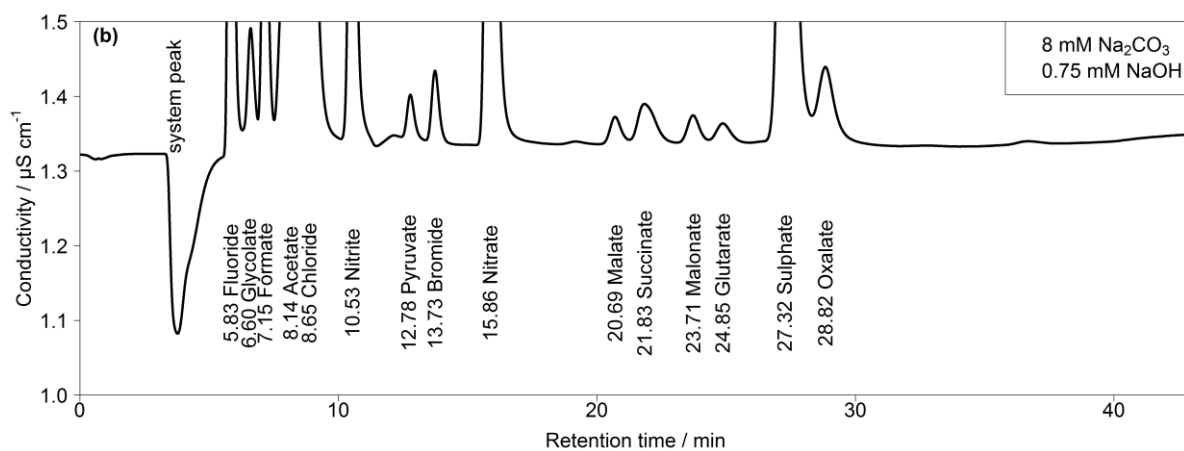

70

71 **Figure S10.** (a) Different eluent concentration of 8 mM  $\text{Na}_2\text{CO}_3$  and 0.75 mM NaOH.  
 72 Chromatogram of a standard solution with aqueous concentrations of  $10 \mu\text{g l}^{-1}$  for  $\text{Cl}^-$ ,  $\text{NO}_3^-$ ,  
 73  $\text{SO}_4^{2-}$ ,  $5 \mu\text{g l}^{-1}$  for  $\text{NO}_2^-$  and  $1 \mu\text{g l}^{-1}$  for  $\text{F}^-$ ,  $\text{Br}^-$  as well as all organic acids. Numbers in front of  
 74 the ion names are the retention times.  $T = 65 \text{ }^\circ\text{C}$  and eluent flow of  $0.8 \text{ ml min}^{-1}$ . (b) Zoom in  
 75 of chromatogram in (a).

76

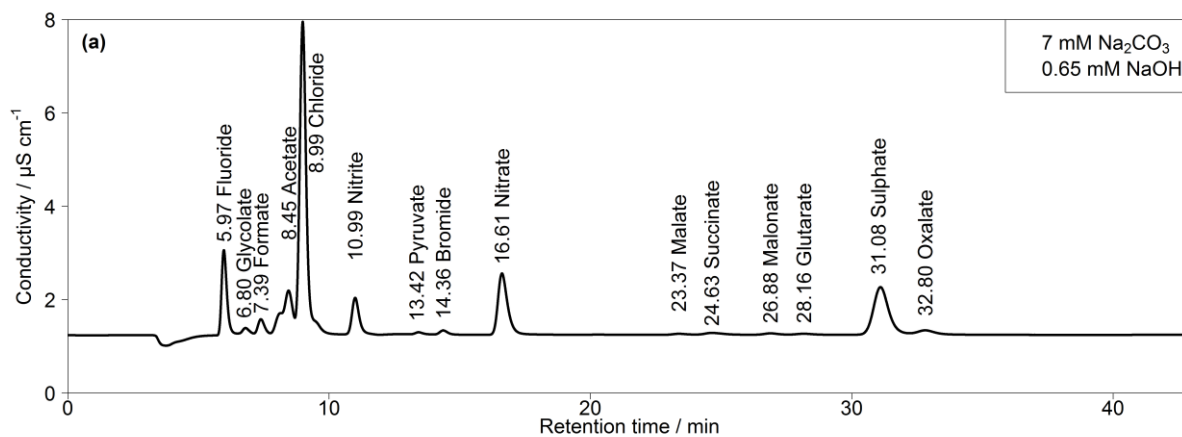

77

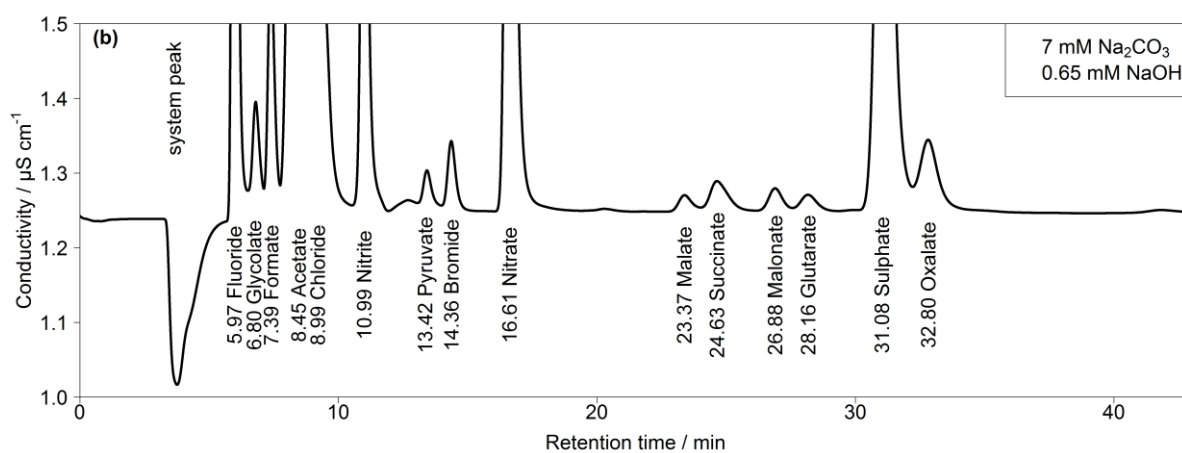

78

79 **Figure S11.** (a) Different eluent concentration of 7 mM Na<sub>2</sub>CO<sub>3</sub> and 0.65 mM NaOH.  
 80 Chromatogram of a standard solution with aqueous concentrations of 10 μg l<sup>-1</sup> for Cl<sup>-</sup>, NO<sub>3</sub><sup>-</sup>,  
 81 SO<sub>4</sub><sup>2-</sup>, 5 μg l<sup>-1</sup> for NO<sub>2</sub><sup>-</sup> and 1 μg l<sup>-1</sup> for F<sup>-</sup>, Br<sup>-</sup> as well as all organic acids. Numbers in front of  
 82 the ion names are the retention times. T = 65 °C and eluent flow of 0.8 ml min<sup>-1</sup>. (b) Zoom in  
 83 of chromatogram in (a).

84

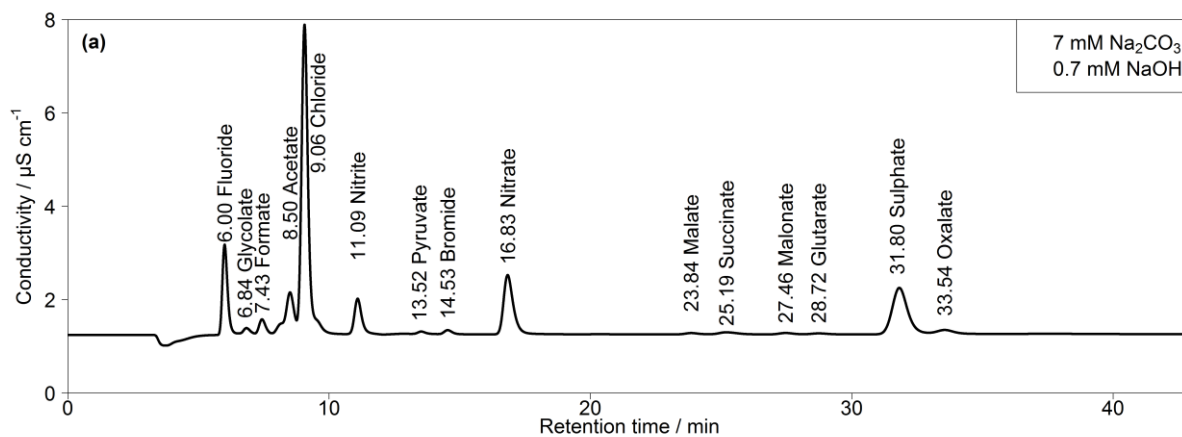

85

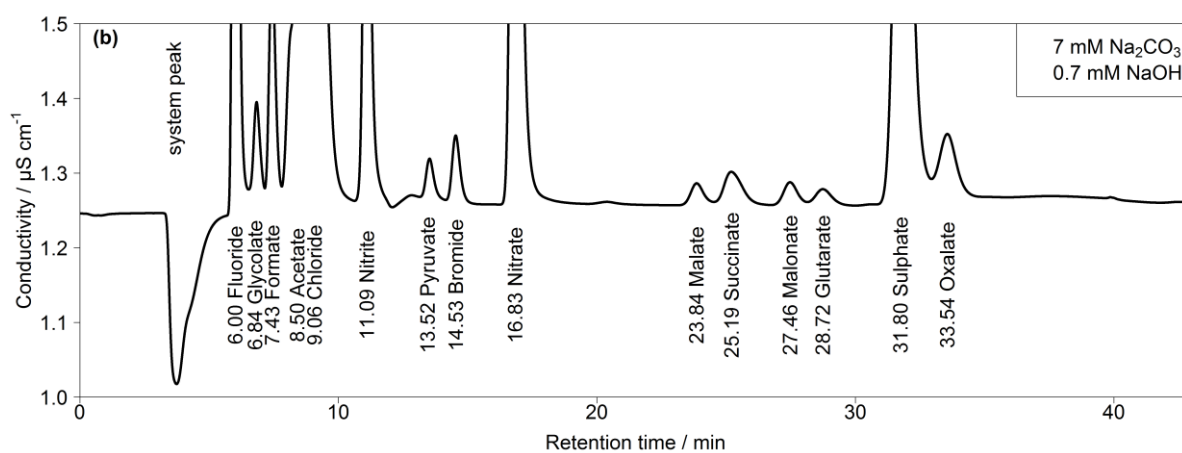

86

87 **Figure S12.** (a) Different eluent concentration of 7 mM  $\text{Na}_2\text{CO}_3$  and 0.7 mM  $\text{NaOH}$ .  
 88 Chromatogram of a standard solution with aqueous concentrations of  $10 \mu\text{g l}^{-1}$  for  $\text{Cl}^-$ ,  $\text{NO}_3^-$ ,  
 89  $\text{SO}_4^{2-}$ ,  $5 \mu\text{g l}^{-1}$  for  $\text{NO}_2^-$  and  $1 \mu\text{g l}^{-1}$  for  $\text{F}^-$ ,  $\text{Br}^-$  as well as all organic acids. Numbers in front of  
 90 the ion names are the retention times.  $T = 65 \text{ }^\circ\text{C}$  and eluent flow of  $0.8 \text{ ml min}^{-1}$ . (b) Zoom in  
 91 of chromatogram in (a).

92

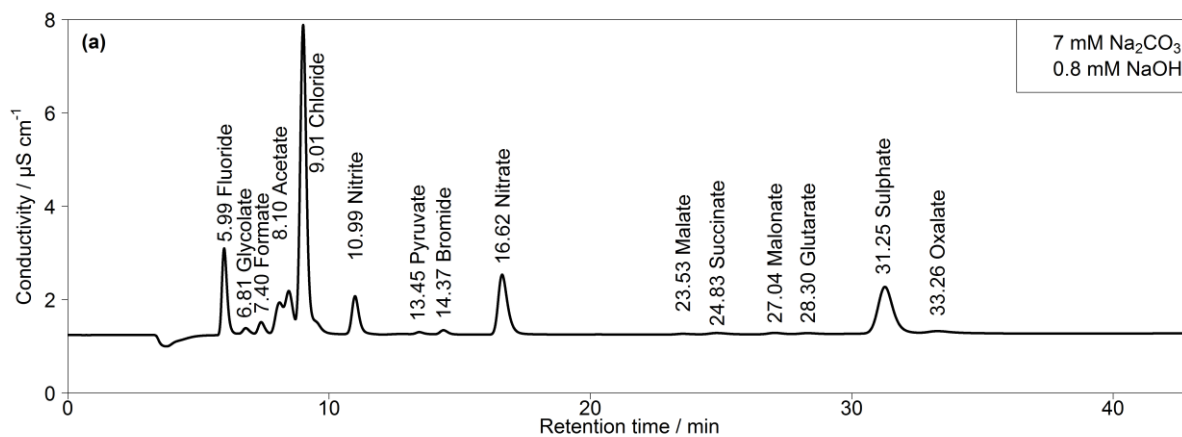

93

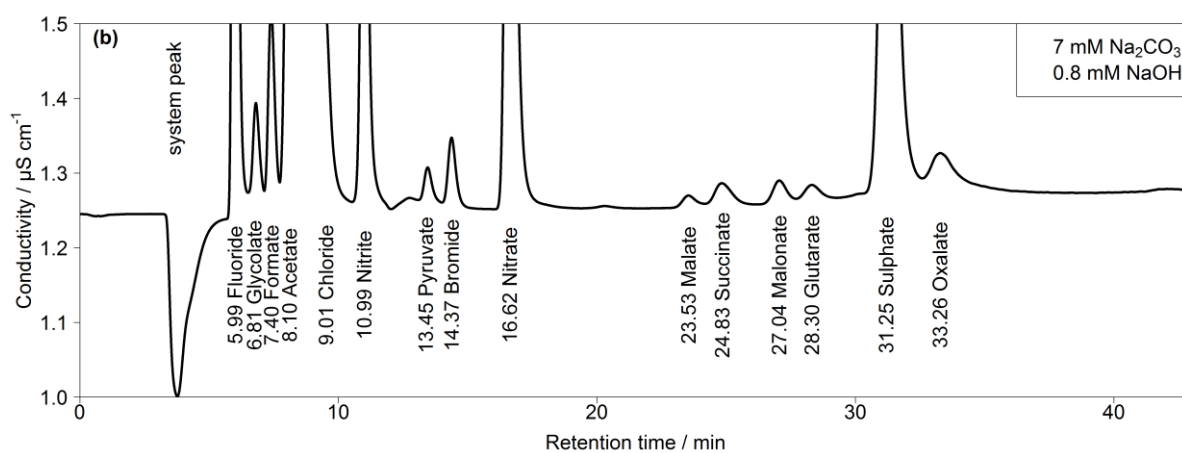

94

95 **Figure S13.** (a) Different eluent concentration of 7 mM Na<sub>2</sub>CO<sub>3</sub> and 0.8 mM NaOH.  
 96 Chromatogram of a standard solution with aqueous concentrations of 10 μg l<sup>-1</sup> for Cl<sup>-</sup>, NO<sub>3</sub><sup>-</sup>,  
 97 SO<sub>4</sub><sup>2-</sup>, 5 μg l<sup>-1</sup> for NO<sub>2</sub><sup>-</sup> and 1 μg l<sup>-1</sup> for F<sup>-</sup>, Br<sup>-</sup> as well as all organic acids. Numbers in front of  
 98 the ion names are the retention times. T = 65 °C and eluent flow of 0.8 ml min<sup>-1</sup>. (b) Zoom in  
 99 of chromatogram in (a).

100

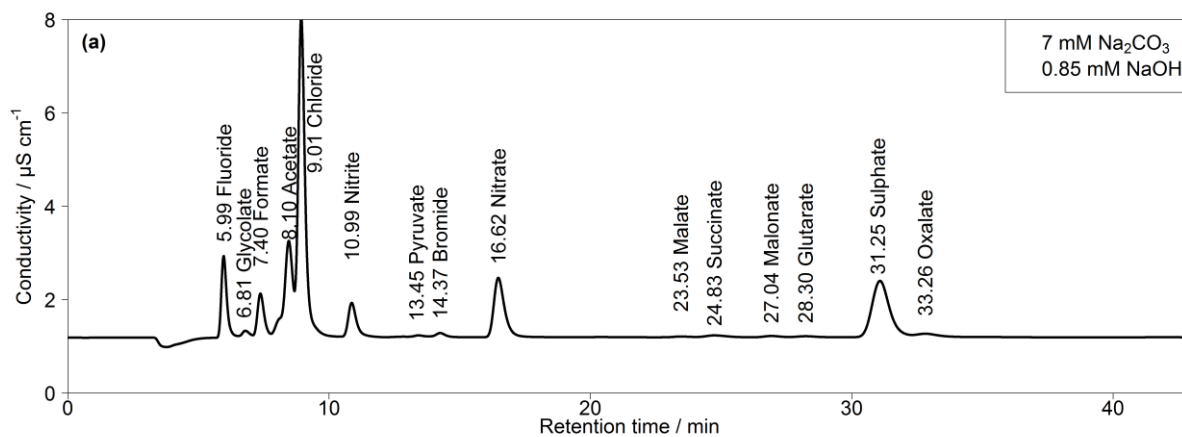

101

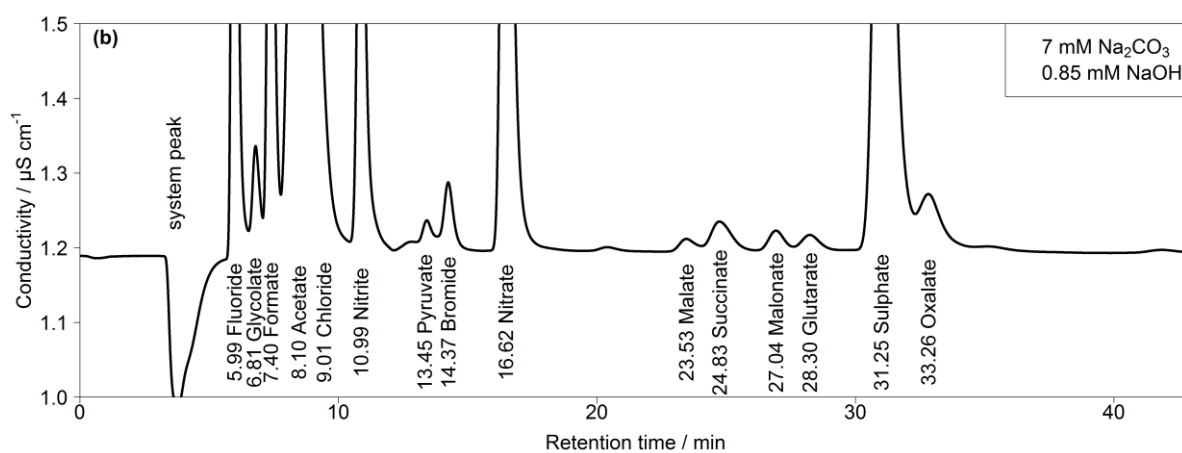

102

103 **Figure S14.** (a) Different eluent concentration of 7 mM Na<sub>2</sub>CO<sub>3</sub> and 0.85 mM NaOH.  
 104 Chromatogram of a standard solution with aqueous concentrations of 10 μg l<sup>-1</sup> for Cl<sup>-</sup>, NO<sub>3</sub><sup>-</sup>,  
 105 SO<sub>4</sub><sup>2-</sup>, 5 μg l<sup>-1</sup> for NO<sub>2</sub><sup>-</sup> and 1 μg l<sup>-1</sup> for F<sup>-</sup>, Br<sup>-</sup> as well as all organic acids. Numbers in front of  
 106 the ion names are the retention times. T = 65 °C and eluent flow of 0.8 ml min<sup>-1</sup>. (b) Zoom in  
 107 of chromatogram in (a).

108

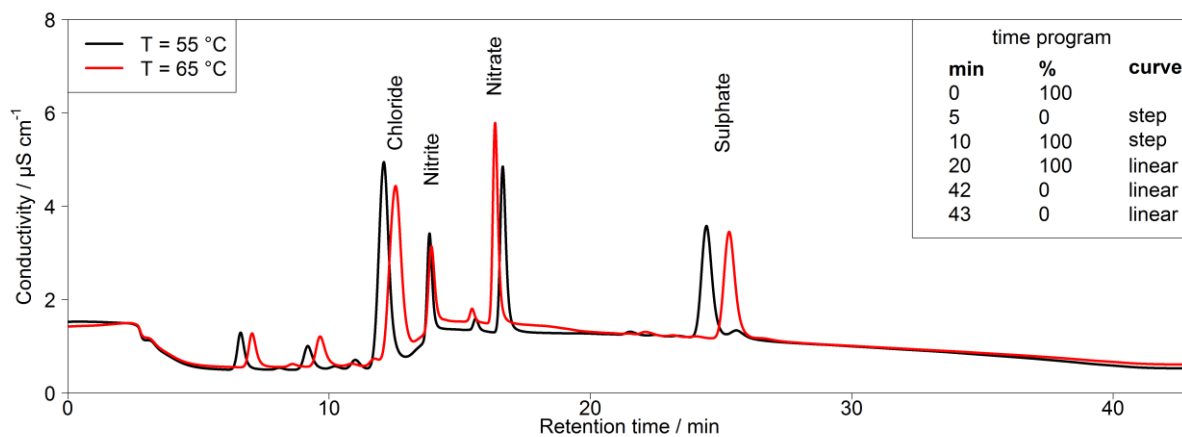

109

110 **Figure S15.** Temperature variation of the column oven for 55 °C (black) and 65 °C (red).  
 111 Eluent concentration of 1-14 mM  $\text{Na}_2\text{CO}_3$  and 0.75 mM NaOH. Chromatogram of a standard  
 112 solution with aqueous concentrations of  $50 \mu\text{g l}^{-1}$  for  $\text{Cl}^-$ ,  $\text{NO}_3^-$ ,  $\text{SO}_4^{2-}$ ,  $25 \mu\text{g l}^{-1}$  for  $\text{NO}_2^-$  and  
 113  $3 \mu\text{g l}^{-1}$  for  $\text{F}^-$ ,  $\text{Br}^-$  as well as all organic acids. Numbers in front of the ion names are the  
 114 retention times. Eluent flow of  $1.0 \text{ ml min}^{-1}$ .

115

116

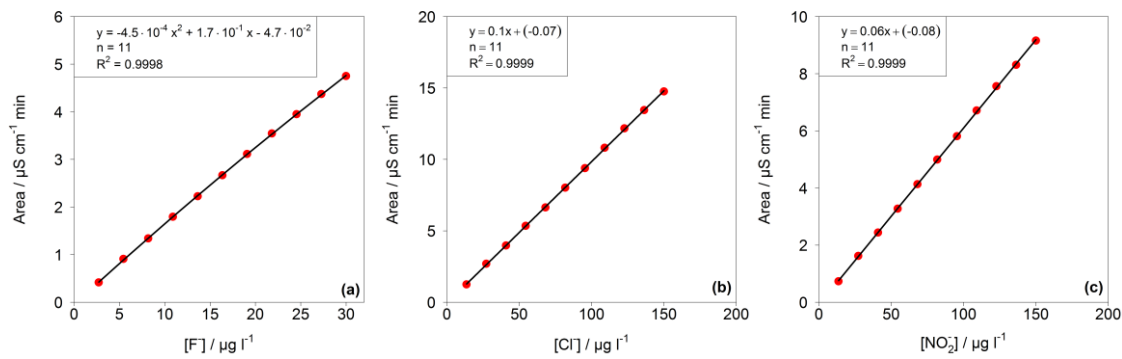

117

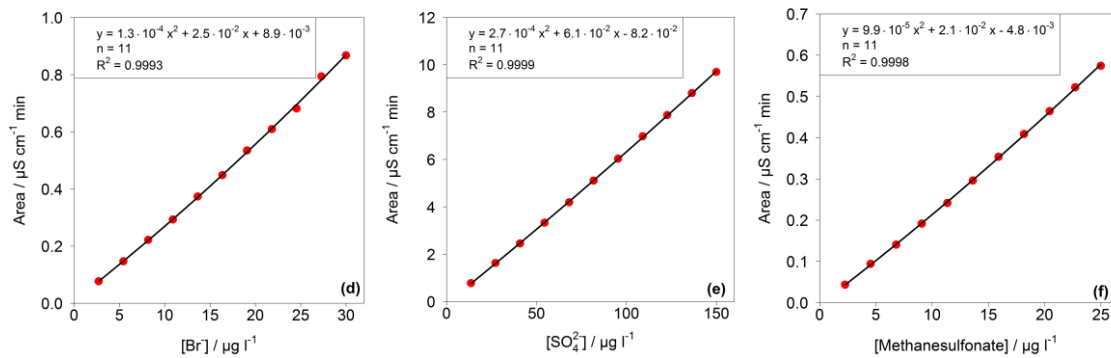

118

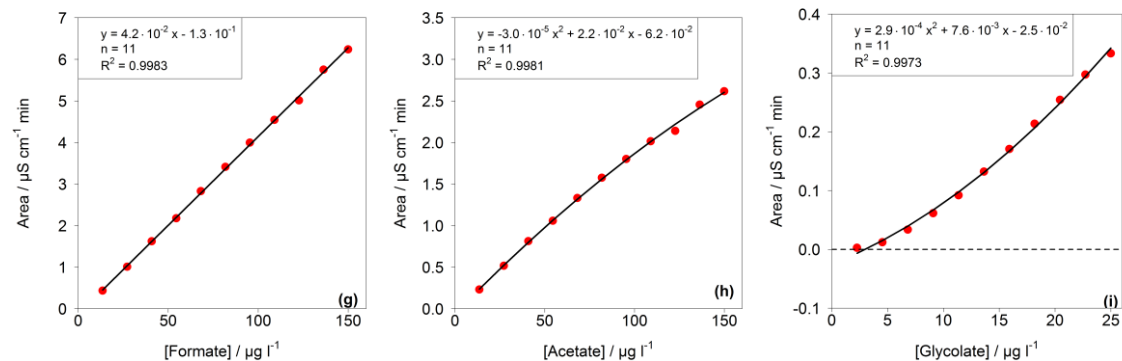

119

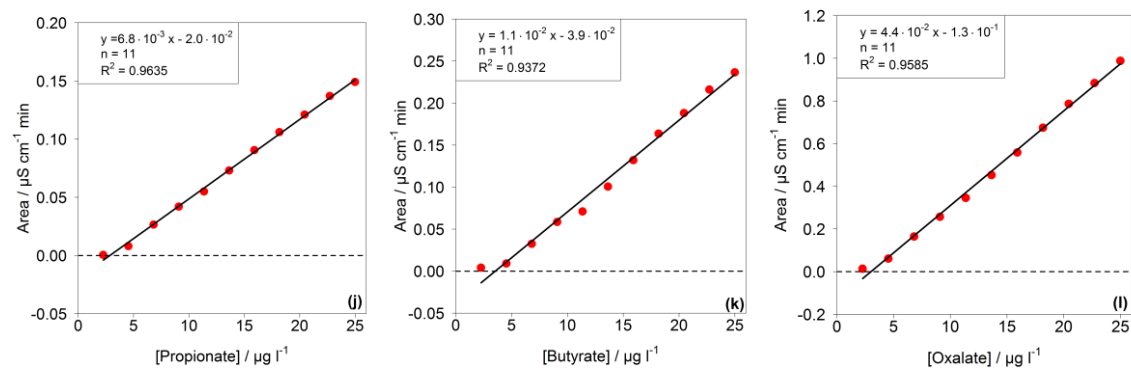



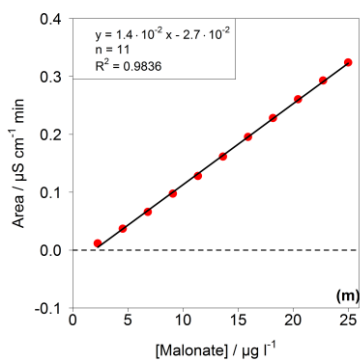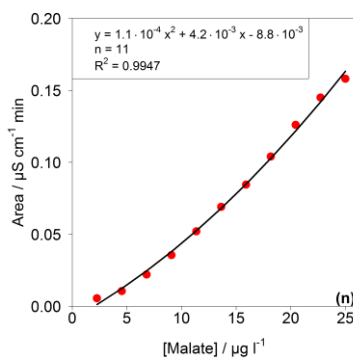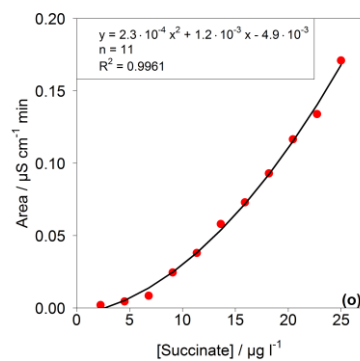

120

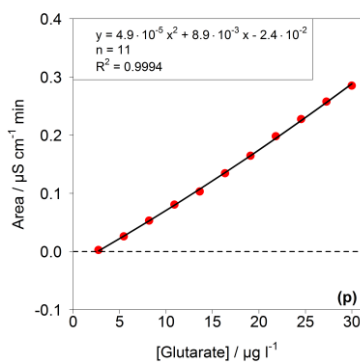

121

122 **Figure S16.** Calibration functions of (a) F<sup>-</sup>, (b) Cl<sup>-</sup>, (c) NO<sub>3</sub><sup>-</sup>, (d) Br<sup>-</sup>, (e) SO<sub>4</sub><sup>2-</sup>, (f)  
 123 methanesulfonate, (g) formate, (h) acetate, (i) glycolate, (j) propionate, (k) butyrate, (l) oxalate,  
 124 (m) malonate, (n) malate, (o) succinate and (p) glutarate.

125

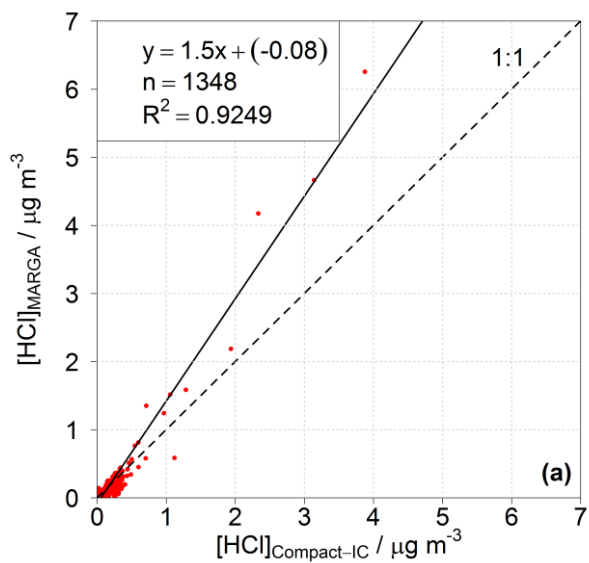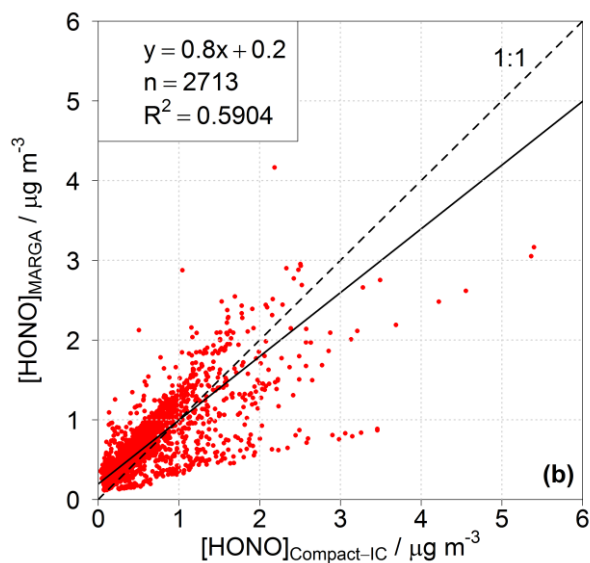

126

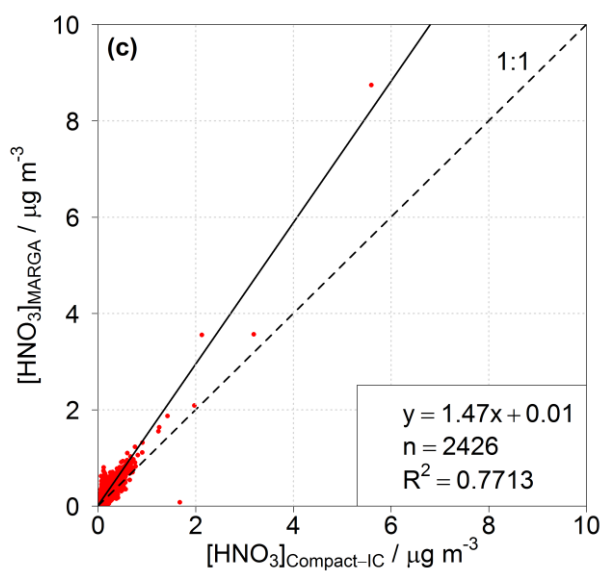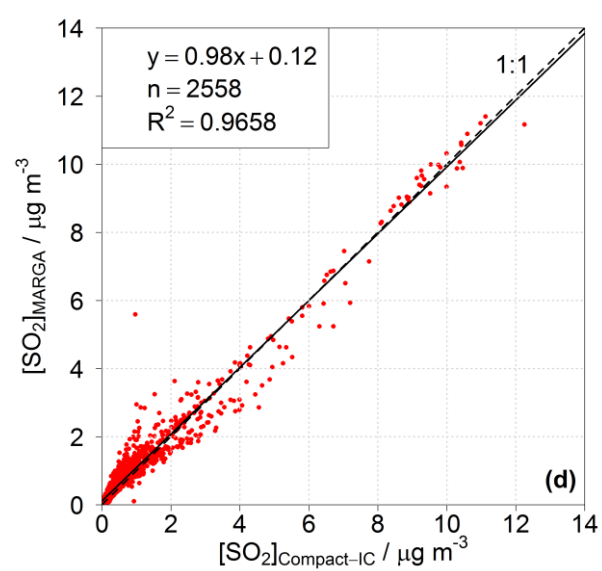

127

128 **Figure S17.** Scatter plots of (a) HCl, (b) HONO, (c) HNO<sub>3</sub> and (d) SO<sub>2</sub> for MARGA and  
 129 Compact-IC measurements in Melpitz during one-year measurement campaign.

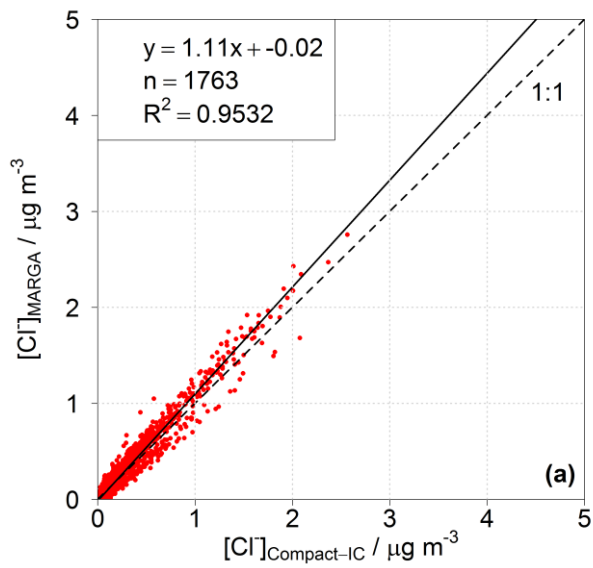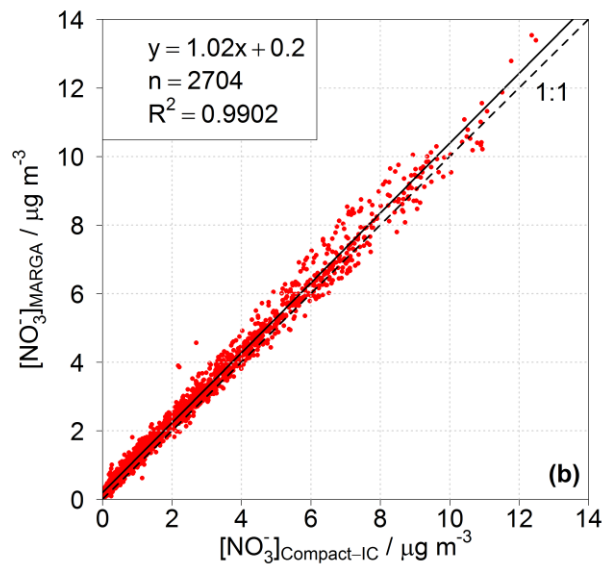

130

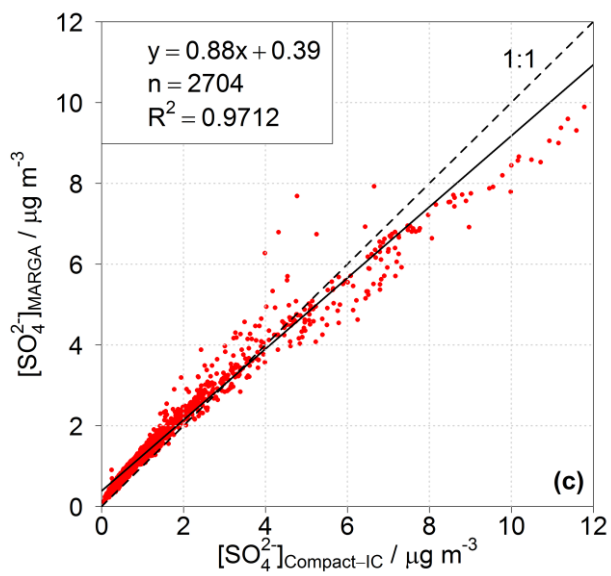

131

132 **Figure S18.** Scatter plots of (a)  $\text{Cl}^-$ , (b)  $\text{NO}_3^-$  and (c)  $\text{SO}_4^{2-}$  for MARGA and Compact-IC  
 133 measurements in Melpitz during the one-year measurement campaign.

134

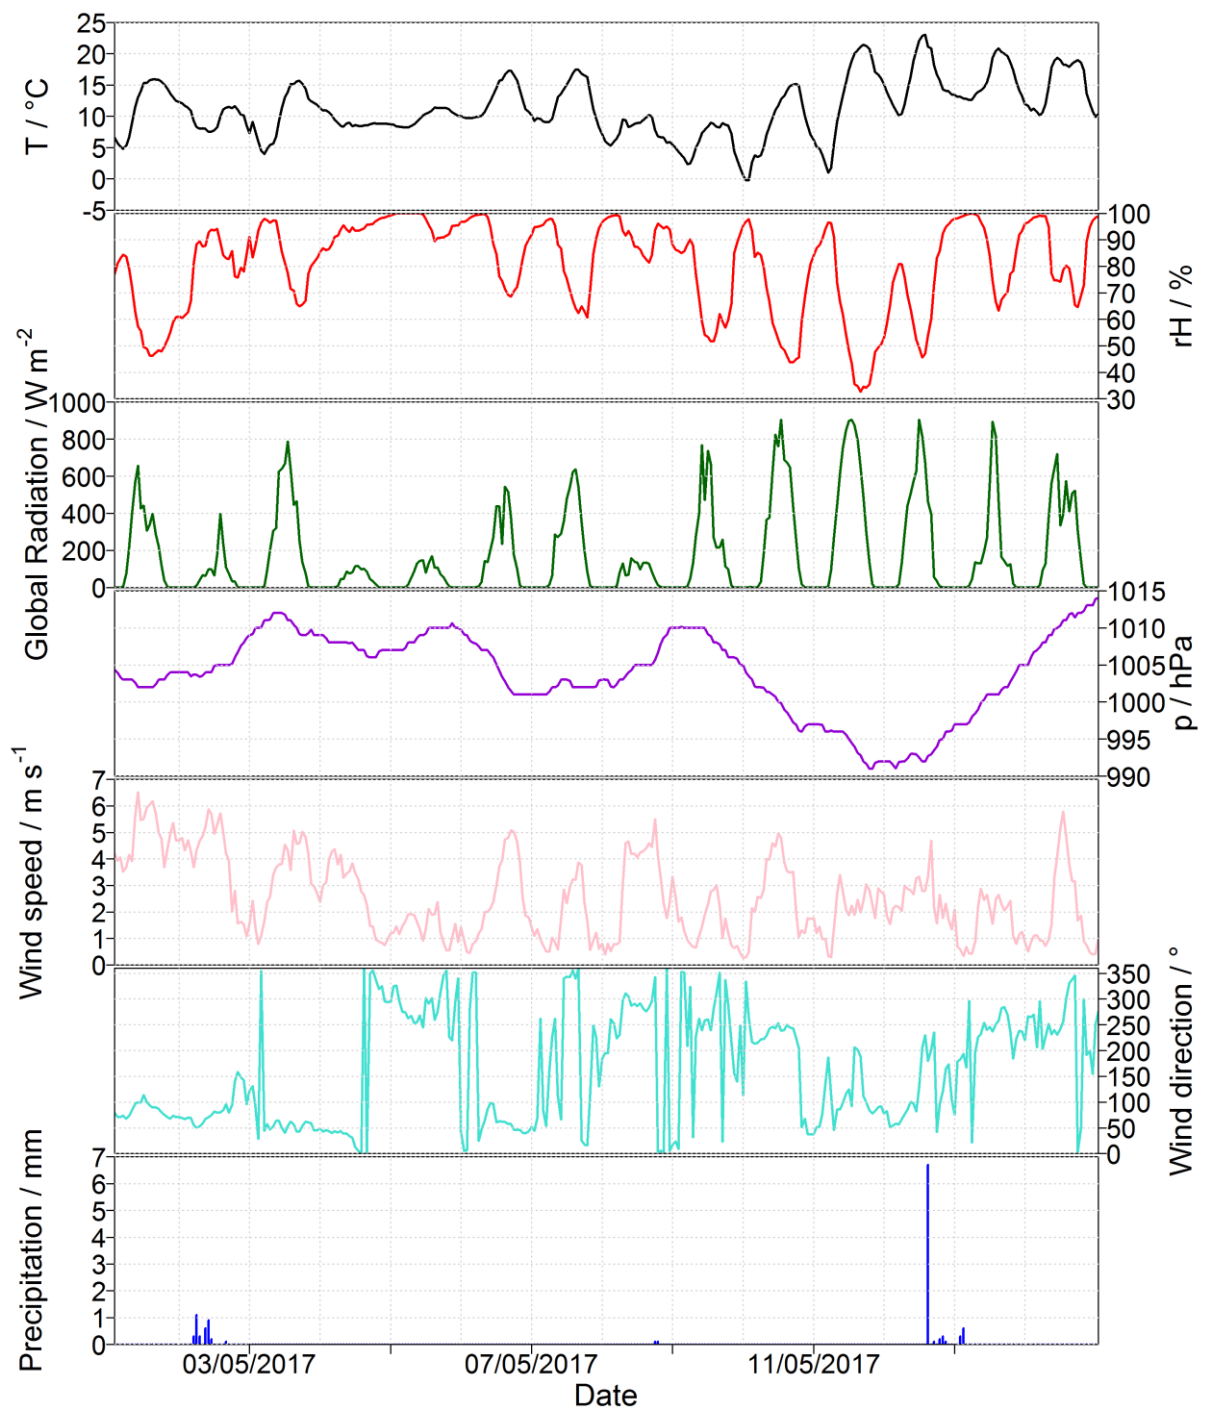

135

136 **Figure S19.** Meteorological parameters during the example application from 1<sup>st</sup> May until 14<sup>th</sup>  
 137 May 2017.

138

139 **Table S1.** Linearity test for the calibration and resulting test values (TV) for each ion.

| <b>Ion</b>                    | <b>TV</b> | <b>Linearity</b> |
|-------------------------------|-----------|------------------|
| F <sup>-</sup>                | 56.9      | quadratic        |
| Cl <sup>-</sup>               | 0.2       | linear           |
| NO <sub>2</sub> <sup>-</sup>  | 2.4       | linear           |
| Br <sup>-</sup>               | 16.4      | quadratic        |
| NO <sub>3</sub> <sup>-</sup>  | 2.6       | linear           |
| SO <sub>4</sub> <sup>2-</sup> | 26.4      | quadratic        |
| Methanesulfonate              | 36.8      | quadratic        |
| Formate                       | 1.6       | linear           |
| Acetate                       | 24.6      | quadratic        |
| Glycolate                     | 34.9      | quadratic        |
| Propionate                    | 0.3       | linear           |
| Butyrate                      | 9.1       | linear           |
| Pyruvate                      | 267.8     | quadratic        |
| Oxalate                       | 2.8       | linear           |
| Malonate                      | 10.7      | linear           |
| Malate                        | 23.7      | quadratic        |
| Succinate                     | 88.8      | quadratic        |
| Glutarate                     | 16.8      | quadratic        |

140

141
